# Supplementary material
Source: publisher site journal article supplement (https://www.dovepress.com/article/534370)
Supplement: Supplementary file 1 [file 534370_Supplementary%20Table%201%20Host%20Table_1.docx]

**Supplementary Table 1** Host Table: Preoperative and Intra-operative Patient Characteristics

| **Preoperative** | **N** | **%** |  | **Intraoperative** | **N** | **%** |
| --- | --- | --- | --- | --- | --- | --- |
| Sex |  |  |  | Surgery |  |  |
| Male | 226 | 61.25 |  | Gastric | 284 | 76.96 |
| Female | 143 | 38.75 |  | Colorectal | 85 | 23.04 |
| Age, yrs |  |  |  | ICU admission |  |  |
| 18-64 | 218 | 59.1 |  | No | 366 | 99.19 |
| ≥ 65 | 151 | 40.9 |  | Yes | 3 | 0.81 |
| BMI, kg/m2 |  |  |  | Duration of surgery |  |  |
| < 18.5 | 25 | 6.78 |  | >3h | 143 | 38.75 |
| 18.5-23.9 | 232 | 62.87 |  | ≤3h | 226 | 61.25 |
| ≥ 24 | 112 | 30.35 |  | Intraoperative use of midazolam |  |  |
| Education level |  |  |  | No | 94 | 25.47 |
| Primary school | 119 | 32.25 |  | Yes | 275 | 75.53 |
| Junior high school or above | 250 | 67.75 |  | Analgesics |  |  |
| Alcohol use |  |  |  | sufentanyl | 183 | 49.59 |
| No | 303 | 82.11 |  | sufentanyl+remifentanyl | 186 | 50.41 |
| Yes | 66 | 17.89 |  | Blood transfusion |  |  |
| Smoking status |  |  |  | No | 311 | 84.28 |
| No | 304 | 82.38 |  | Yes | 58 | 15.72 |
| Yes | 65 | 17.62 |  | Total fluid intake, ml |  |  |
| Quality of sleep |  |  |  | <2000 | 45 | 12.2 |
| Good | 280 | 75.88 |  | 2000-3000 | 247 | 66.94 |
| Poor | 89 | 24.12 |  | >3000 | 77 | 20.87 |
| Benzodiazepine use |  |  |  | Total blood transfusion, ml |  |  |
| No | 363 | 98.37 |  | <400 | 313 | 84.82 |
| Yes | 6 | 1.63 |  | ≥400 | 56 | 15.18 |
| Psychiatric disorders |  |  |  | Total blood loss, ml |  |  |
| No | 364 | 98.64 |  | <100 | 94 | 25.47 |
| Yes | 5 | 1.36 |  | ≥100 | 275 | 74.53 |
| Cerebrovascular diseases history |  |  |  | Total urine output, ml |  |  |
| No | 327 | 88.62 |  | <400 | 148 | 40.11 |
| Yes | 42 | 11.38 |  | 400-1000 | 189 | 51.22 |
| ASA score |  |  |  | >1000 | 25 | 6.78 |
| I-II | 316 | 85.64 |  | missing | 7 | 1.9 |
| III-IV | 53 | 14.36 |  |  |  |  |
| Serum albumin, g/L |  |  |  |  |  |  |
| 35-55 | 307 | 83.20 |  |  |  |  |
| < 35 | 62 | 16.80 |  |  |  |  |
| Serum hemoglobin, g/L |  |  |  |  |  |  |
| 131-172 | 227 | 61.52 |  |  |  |  |
| < 131 | 142 | 38.48 |  |  |  |  |
| Serum glucose, mmol/L |  |  |  |  |  |  |
| 3.90-6.10 | 300 | 81.30 |  |  |  |  |
| > 6.10 | 69 | 18.70 |  |  |  |  |
| Serum total bilirubin, umol/L |  |  |  |  |  |  |
| 4.7-24 | 343 | 92.95 |  |  |  |  |
| > 24 | 26 | 7.05 |  |  |  |  |
| Serum urea, mmol/L |  |  |  |  |  |  |
| 2.5-7.1 | 338 | 91.60 |  |  |  |  |
| > 7.1 | 31 | 8.40 |  |  |  |  |
| Serum creatinine, umol/L |  |  |  |  |  |  |
| 62-115 | 359 | 97.29 |  |  |  |  |
| > 115 | 10 | 2.71 |  |  |  |  |
| Serum sodium, mmol/L |  |  |  |  |  |  |
| 130-147 | 368 | 99.73 |  |  |  |  |
| > 147 | 1 | 0.27 |  |  |  |  |
| Serum phosphorus, mmol/L |  |  |  |  |  |  |
| 0.8-1.6 | 357 | 96.75 |  |  |  |  |
| < 1.6 | 12 | 3.25 |  |  |  |  |
| Serum white blood cell, ×109/L |  |  |  |  |  |  |
| 3.97-9.15 | 355 | 96.21 |  |  |  |  |
| > 9.15 | 14 | 3.79 |  |  |  |  |
| Serum hematocrit |  |  |  |  |  |  |
| 0.380-0.508 | 248 | 67.21 |  |  |  |  |
| < 0.380 | 121 | 32.79 |  |  |  |  |

**Abbreviations:** ASA, American Society of Anesthesiologists scale; BMI, Body Mass Index; ICU, Intensive care unit.
